# Supplementary material for: Bestrophin-3 Expression in a Subpopulation of Astrocytes in the Neonatal Brain After Hypoxic-Ischemic Injury
Source: PubMed Central journal article supplement (PMC6362097; doi:10.3389/fphys.2019.00023), 2019-01-29
Supplement: Table_1.pdf [file Table_1.pdf]

**Table S1**

The table shows statistics for the data in Fig. 3. Data were analyzed by mixed-model three-way ANOVA on Cp values. The table shows significance data for main effects and interactions as well as for estimated marginal means. In the table, side means comparison between uninjured (right) and injured (left) hemispheres, treatment is comparison between hypoxia-ischemia and sham, and period is comparison between the various time points. R vs sham shows comparison of estimated marginal means between uninjured (right) hemisphere for hypoxia-ischemia and sham for the various time points, L vs sham the same for the left (injured) ventricle, and R vs L a similar comparison between the two hemispheres in hypoxia-ischemia. df = degrees of freedom, F = Fisher's F value, P = significance.

**Fig 3a Best3 total**

|                                  |     | <b>df</b> | <b>F</b> | <b>P</b> |
|----------------------------------|-----|-----------|----------|----------|
| <b>side</b>                      |     | 1,31      | 1.071    | 0.309    |
| <b>treatment</b>                 |     | 1,31      | 1.200    | 0.282    |
| <b>period</b>                    |     | 4,31      | 5.300    | 0.002    |
| <b>side x treatment</b>          |     | 1,31      | 1.071    | 0.309    |
| <b>side x period</b>             |     | 4,31      | 1.086    | 0.380    |
| <b>side x treatment x period</b> |     | 4,31      | 1.086    | 0.380    |
| <b>R vs sham</b>                 | 6h  | 1,31      | 10.138   | 0.003    |
|                                  | 12h | 1,31      | 5.237    | 0.029    |
|                                  | 24h | 1,31      | 0.015    | 0.902    |
|                                  | 72h | 1,31      | 4.938    | 0.034    |
|                                  | 7d  | 1,31      | 0.003    | 0.954    |
| <b>L vs sham</b>                 | 6h  | 1,31      | 5.177    | 0.030    |
|                                  | 12h | 1,31      | 0.014    | 0.908    |
|                                  | 24h | 1,31      | 0.023    | 0.881    |
|                                  | 72h | 1,31      | 1.060    | 0.311    |
|                                  | 7d  | 1,31      | 1.166    | 0.289    |
| <b>R vs L</b>                    | 6h  | 1,31      | 2.518    | 0.123    |
|                                  | 12h | 1,31      | 7.357    | 0.011    |
|                                  | 24h | 1,31      | 0.000    | 0.994    |
|                                  | 72h | 1,31      | 2.952    | 0.096    |
|                                  | 7d  | 1,31      | 1.771    | 0.193    |

**Fig 3b Best3 “+6”**

|                                  |     | <b>df</b> | <b>F</b> | <b>P</b> |
|----------------------------------|-----|-----------|----------|----------|
| <b>side</b>                      |     | 1,31      | 32.111   | 0.000    |
| <b>treatment</b>                 |     | 1,31      | 12.158   | 0.001    |
| <b>period</b>                    |     | 4,31      | 5.328    | 0.002    |
| <b>side x treatment</b>          |     | 1,31      | 32.111   | 0.000    |
| <b>side x period</b>             |     | 4,31      | 2.747    | 0.046    |
| <b>side x treatment x period</b> |     | 4,31      | 2.747    | 0.046    |
| <b>R vs sham</b>                 | 6h  | 1,31      | 19.054   | 0.000    |
|                                  | 12h | 1,31      | 19.016   | 0.000    |
|                                  | 24h | 1,31      | 3.165    | 0.085    |
|                                  | 72h | 1,31      | 1.083    | 0.306    |
|                                  | 7d  | 1,31      | 0.011    | 0.916    |
| <b>L vs sham</b>                 | 6h  | 1,31      | 2.841    | 0.102    |
|                                  | 12h | 1,31      | 4.803    | 0.036    |
|                                  | 24h | 1,31      | 0.616    | 0.438    |
|                                  | 72h | 1,31      | 20.610   | 0.000    |
|                                  | 7d  | 1,31      | 7.947    | 0.008    |
| <b>R vs L</b>                    | 6h  | 1,31      | 33.903   | 0.000    |
|                                  | 12h | 1,31      | 39.548   | 0.000    |
|                                  | 24h | 1,31      | 0.187    | 0.669    |
|                                  | 72h | 1,31      | 27.160   | 0.000    |
|                                  | 7d  | 1,31      | 16.693   | 0.000    |

**Fig 3c Best “-6”**

|                                  |     | <b>df</b> | <b>F</b> | <b>P</b> |
|----------------------------------|-----|-----------|----------|----------|
| <b>side</b>                      |     | 1,31      | 34.843   | 0.000    |
| <b>treatment</b>                 |     | 1,31      | 35.851   | 0.000    |
| <b>period</b>                    |     | 4,31      | 6.359    | 0.001    |
| <b>side x treatment</b>          |     | 1,31      | 34.842   | 0.000    |
| <b>side x period</b>             |     | 4,31      | 1.945    | 0.128    |
| <b>side x treatment x period</b> |     | 4,31      | 1.945    | 0.128    |
| <b>R vs sham</b>                 | 6h  | 1,31      | 29.778   | 0.000    |
|                                  | 12h | 1,31      | 23.979   | 0.000    |
|                                  | 24h | 1,31      | 0.539    | 0.468    |
|                                  | 72h | 1,31      | 1.698    | 0.202    |
|                                  | 7d  | 1,31      | 0.408    | 0.528    |
| <b>L vs sham</b>                 | 6h  | 1,31      | 34.744   | 0.000    |
|                                  | 12h | 1,31      | 16.287   | 0.000    |
|                                  | 24h | 1,31      | 2.687    | 0.111    |
|                                  | 72h | 1,31      | 8.511    | 0.007    |
|                                  | 7d  | 1,31      | 1.584    | 0.218    |
| <b>R vs L</b>                    | 6h  | 1,31      | 22.044   | 0.000    |
|                                  | 12h | 1,31      | 2.717    | 0.109    |
|                                  | 24h | 1,31      | 20.224   | 0.000    |
|                                  | 72h | 1,31      | 56.865   | 0.000    |
|                                  | 7d  | 1,31      | 12.645   | 0.001    |

**Fig.3d Nestin**

|                                  |     | <b>df</b> | <b>F</b> | <b>P</b> |
|----------------------------------|-----|-----------|----------|----------|
| <b>side</b>                      |     | 1,31      | 30.520   | 0.000    |
| <b>treatment</b>                 |     | 1,31      | 13.788   | 0.001    |
| <b>period</b>                    |     | 4,31      | 0.497    | 0.738    |
| <b>side x treatment</b>          |     | 1,31      | 30.520   | 0.000    |
| <b>side x period</b>             |     | 4,31      | 1.935    | 0.129    |
| <b>side x treatment x period</b> |     | 4,31      | 1.935    | 0.129    |
| <b>R vs sham</b>                 | 6h  | 1,31      | 3.939    | 0.056    |
|                                  | 12h | 1,31      | 5.788    | 0.022    |
|                                  | 24h | 1,31      | 2.248    | 0.144    |
|                                  | 72h | 1,31      | 0.325    | 0.572    |
|                                  | 7d  | 1,31      | 2.353    | 0.135    |
| <b>L vs sham</b>                 | 6h  | 1,31      | 3.057    | 0.090    |
|                                  | 12h | 1,31      | 11.024   | 0.002    |
|                                  | 24h | 1,31      | 11.689   | 0.002    |
|                                  | 72h | 1,31      | 6.530    | 0.016    |
|                                  | 7d  | 1,31      | 0.959    | 0.335    |
| <b>R vs L</b>                    | 6h  | 1,31      | 18.294   | 0.000    |
|                                  | 12h | 1,31      | 42.137   | 0.000    |
|                                  | 24h | 1,31      | 46.489   | 0.000    |
|                                  | 72h | 1,31      | 11.769   | 0.002    |
|                                  | 7d  | 1,31      | 0.068    | 0.796    |

**Fig 3e CHOP**

|                                  |     | <b>df</b> | <b>F</b> | <b>P</b> |
|----------------------------------|-----|-----------|----------|----------|
| <b>side</b>                      |     | 1,31      | 71.304   | 0.000    |
| <b>treatment</b>                 |     | 1,31      | 89.429   | 0.000    |
| <b>period</b>                    |     | 4,31      | 1.576    | 0.205    |
| <b>side x treatment</b>          |     | 1,31      | 71.305   | 0.000    |
| <b>side x period</b>             |     | 4,31      | 4.486    | 0.006    |
| <b>side x treatment x period</b> |     | 4,31      | 4.486    | 0.006    |
| <b>R vs sham</b>                 | 6h  | 1,31      | 1.891    | 0.179    |
|                                  | 12h | 1,31      | 4.396    | 0.044    |
|                                  | 24h | 1,31      | 2.055    | 0.162    |
|                                  | 72h | 1,31      | 1.137    | 0.295    |
|                                  | 7d  | 1,31      | 2.611    | 0.116    |
| <b>L vs sham</b>                 | 6h  | 1,31      | 60.668   | 0.000    |
|                                  | 12h | 1,31      | 25.864   | 0.000    |
|                                  | 24h | 1,31      | 21.270   | 0.000    |
|                                  | 72h | 1,31      | 20.047   | 0.000    |
|                                  | 7d  | 1,31      | 4.948    | 0.034    |
| <b>R vs L</b>                    | 6h  | 1,31      | 136.073  | 0.000    |
|                                  | 12h | 1,31      | 69.806   | 0.000    |
|                                  | 24h | 1,31      | 28.219   | 0.000    |
|                                  | 72h | 1,31      | 26.390   | 0.000    |
|                                  | 7d  | 1,31      | 3.006    | 0.093    |
